# Supplementary material for: A new mouse model of Canavan leukodystrophy displays hearing impairment due to central nervous system dysmyelination
Source: PubMed Central journal article supplement (PMC4036472; doi:10.1242/dmm.014605), 2014-03-28
Supplement: supp_7.6.649_DMM014605.pdf [file supp_7.6.649_DMM014605.pdf]

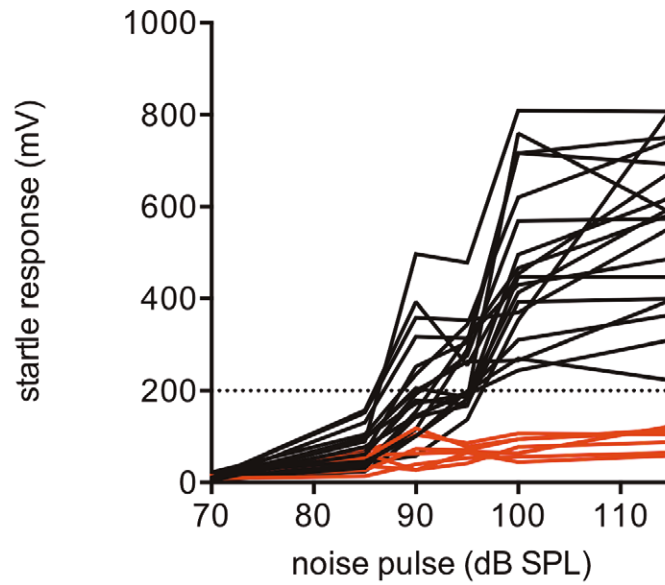

**Supplementary Figure 1: Isolation of *deaf14* strain from ENU mutagenesis screen**

Acoustic startle responses of 26 G<sub>3</sub> mice from the *deaf14* founder pedigree. Seven mice (red lines) displayed a response below 200 arbitrary units (dotted line). One of these mice was crossed to BALB/c and offspring intercrossed to found the *deaf14* line.

**Supplementary Table 1: PCR primers**

| Name          | Sequence                                             |
|---------------|------------------------------------------------------|
| rs3142842-F1  | GAAGGTCGGAGTCAACGGATTGTGGAGCTGAGAAGAGGAGG            |
| rs3142842-F2  | GAAGGTGACCAAGTTCATGCTGGTGGAGCTGAGAAGAGGAGA           |
| rs3142842-R   | ACCGCAGTGCATGGACTTT                                  |
| rs3676084-F1  | GAAGGTCGGAGTCAACGGATTTGCTCCTGCTTGTTAGCTGTCC          |
| rs3676084-F2  | GAAGGTGACCAAGTTCATGCTTCTGCTCCTGCTTGTTAGCTGTC<br>T    |
| rs3676084-R   | GGTGGGTAGAAATGGAGAGAAT                               |
| rs6197793-F1  | GAAGGTCGGAGTCAACGGATTAGTATTCCACCACTGGGCTGTA          |
| rs6197793-F2  | GAAGGTGACCAAGTTCATGCTTATTCCACCACTGGGCTGC             |
| rs6197793-R   | GCAGAACAGGAACCCTCAAT                                 |
| rs13481117-F1 | GAAGGTCGGAGTCAACGGATTTCAAGATTGTTCTCAGATCAGA<br>TTCC  |
| rs13481117-F2 | GAAGGTGACCAAGTTCATGCTGTCAAGATTGTTCTCAGATCAGA<br>TTCA |
| rs13481117-R  | TCTACCCACCCACCTATT                                   |
| MC39          | ACTTGCATGGCTCCATTACC                                 |
| MC40          | ACAGCTAGGGCTTGCCTACA                                 |
| Aspa-F1       | GAAGGTCGGAGTCAACGGATTCCACTCGTTCCATTGCCAAGTA<br>A     |
| Aspa-F2       | GAAGGTGACCAAGTTCATGCTTCCACTCGTTCCATTGCCAAGTA<br>T    |
| Aspa-R        | AGCAGGAAGTGTGACTTACCAA                               |
